# Supplementary material
Source: PubMed Central journal article supplement (PMC3282169)
Supplement: NIHMS328463-supplement-01.pdf [file NIHMS328463-supplement-01.pdf]

| Sample/Template               | details                                                                                                                                                                                                                                                                                                                                                              |
|-------------------------------|----------------------------------------------------------------------------------------------------------------------------------------------------------------------------------------------------------------------------------------------------------------------------------------------------------------------------------------------------------------------|
| Source                        | Cultured human chondrocytes; SW1353 cells; THP-1 cells                                                                                                                                                                                                                                                                                                               |
| Method of preservation        | No preservation; Total RNA was extracted directly from PBS washed cell layers                                                                                                                                                                                                                                                                                        |
| Storage time (if appropriate) | RNA was stored at -80°C and reverse transcribed into cDNA within one month. cDNA was stored at -80°C and analyzed within 6 months.                                                                                                                                                                                                                                   |
| Handling                      |                                                                                                                                                                                                                                                                                                                                                                      |
| Extraction method             | Column based extraction method (NucleoSpin RNA II Kit (Macherey-Nagel, D)).                                                                                                                                                                                                                                                                                          |
| RNA: DNA-free                 | <p>All primer pairs used (IL-1<math>\beta</math>, TNF-<math>\alpha</math>, iNOS, COX2, GAPDH, ACTB, HPRT1, SDHA, B2M) are intron-spanning primers. The RNA extraction protocol included on-column DNA digestion. Using microfluidics (Bioanalyzer), the quality of each RNA preparation was verified. 'Minus RT controls' were prepared from random RNA samples.</p> |
| Concentration                 | All RNA preparations were quantified using microfluidics (Bioanalyzer).                                                                                                                                                                                                                                                                                              |
| RNA: integrity                | Integrity of RNA each preparation was verified using microfluidics (Bioanalyzer).                                                                                                                                                                                                                                                                                    |

|                                      |                                                                                                                                                                                                 |
|--------------------------------------|-------------------------------------------------------------------------------------------------------------------------------------------------------------------------------------------------|
| Inhibition-free                      | Not all samples were tested for the absence of inhibitors. However, a representative set of 10 samples was used to control for the absence of inhibitors using dilution series of target genes. |
| <b>Assay optimisation/validation</b> |                                                                                                                                                                                                 |
| Accession numbers                    | IL-1 $\beta$ (NM_000576); TNF-a (NM_000594); iNOS (NM_000625); COX2 (NM_000963)                                                                                                                 |
| Amplicon details                     | IL-1 $\beta$ (132bp); TNF-a (126bp); iNOS (127bp); COX2 (136bp)                                                                                                                                 |
| Primer sequence                      |                                                                                                                                                                                                 |
| IL-1 $\beta$ fw:                     | CCTATTACAGTGGCAATGAGGATG                                                                                                                                                                        |
| IL-1 $\beta$ rv:                     | AGTGGTGGTCGGAGATTCG                                                                                                                                                                             |
| TNF-a fw:                            | GCGGTGCTTGTTCTCAG                                                                                                                                                                               |
| TNF-a rv:                            | GCTACAGGCTTGTCCTCG                                                                                                                                                                              |
| iNOS fw:                             | GTTCTCACGGCACAGGTCTC                                                                                                                                                                            |
| iNOS rv:                             | GCAGGTCCTTATGTCCTTATC                                                                                                                                                                           |
| COX2 fw:                             | CCGAGGTGTATGTATGAGTGTG                                                                                                                                                                          |
| COX2 rv:                             | TGTGTTTGGAGTGGGTTTCAG                                                                                                                                                                           |
| GAPDH fw:                            | GGAGTCCACTGGCGTCTTCAC                                                                                                                                                                           |
| GAPDH rv:                            | GAGGCATTGCTGATGATCTTGAGG                                                                                                                                                                        |
| ACTB fw:                             | CTGGAACGGTGAAGGTGACA                                                                                                                                                                            |
| ACTB rv:                             | AAGGGACTTCCTGTAACAATGCA                                                                                                                                                                         |
| B2M fw:                              | TGCTGTCTCCATGTTTGATGTATCT                                                                                                                                                                       |
| B2M rv:                              | TCTCTGCTCCCCACCTCTAAGT                                                                                                                                                                          |
| HPRT1 fw:                            | TGACACTGGCAAACAATGCA                                                                                                                                                                            |

|                        |                                                                                                                                                                                                                                                                                                                              |
|------------------------|------------------------------------------------------------------------------------------------------------------------------------------------------------------------------------------------------------------------------------------------------------------------------------------------------------------------------|
| HPRT1 rv:              | GGTCCTTTTCACCAGCAAGCT                                                                                                                                                                                                                                                                                                        |
| SDHA fw:               | TGGGAACAAGAGGGCATCTG                                                                                                                                                                                                                                                                                                         |
| SDHA rv:               | CCACCACTGCATCAAATTCATG                                                                                                                                                                                                                                                                                                       |
|                        |                                                                                                                                                                                                                                                                                                                              |
| <i>Probe sequence*</i> | no probes used                                                                                                                                                                                                                                                                                                               |
| <i>In silico</i>       | All primers were subjected to BLAST analysis                                                                                                                                                                                                                                                                                 |
| empirical              | Primers for IL-1 $\beta$ , TNF-a, iNOS and COX2 were used at 100 nM                                                                                                                                                                                                                                                          |
| Priming conditions     | For cDNA synthesis, random RT primers were used as provided by the manufacturer (High Capacity cDNA Reverse Transcription Kit (Applied Biosystems, Austria)).                                                                                                                                                                |
| PCR efficiency         | qPCR efficiencies were determined using dilution series of cDNA prepared from chondrocyte mRNA. IL-1 $\beta$ (E=95.1%; slope= -3.444; R <sup>2</sup> =0.996); TNF-a (E=94.6%; slope= -3.458; R <sup>2</sup> = 0.999); iNOS (E=99.4%; slope= -3.337; R <sup>2</sup> =1); COX2 (E=96.5%; slope= -3.408; R <sup>2</sup> =0.999) |
| Linear dynamic range   | The dynamic range of the primers was spanning unknown targets as determined by dilution curves.                                                                                                                                                                                                                              |
| Limits of detection    | LODs were not determined in this study.                                                                                                                                                                                                                                                                                      |
| Intra-assay variation  | The intra-assay variation was below one Cq.                                                                                                                                                                                                                                                                                  |
| <b>RT/PCR</b>          |                                                                                                                                                                                                                                                                                                                              |

|                      |                                                                                                                                                                                                                                                                                                                                                                                                                                                                                                                                                                |
|----------------------|----------------------------------------------------------------------------------------------------------------------------------------------------------------------------------------------------------------------------------------------------------------------------------------------------------------------------------------------------------------------------------------------------------------------------------------------------------------------------------------------------------------------------------------------------------------|
| Protocols            | <p><b>RT:</b> equal RNA quantities were reverse transcribed into cDNA using the High Capacity cDNA Reverse Transcription Kit (Applied Biosystems, Austria; LOT#: 4368814).</p> <p><b>qPCR:</b> reactions were performed in 25 <math>\mu</math>l reaction mixtures containing 1 <math>\mu</math>l cDNA, 12.5 <math>\mu</math>l SensiMix SYBR Green Master Mix (GenXpress, Austria; LOT#: SMP-110E), 100 nM primers (Metabion, Martinsried, D), and nuclease-free water to 25 <math>\mu</math>l, and run in duplicate on a Mx3000P QPCR system (Stratagene).</p> |
| Reagents             | see above.                                                                                                                                                                                                                                                                                                                                                                                                                                                                                                                                                     |
| Duplicate RT         | Replicates of the RT step were not performed in this study.                                                                                                                                                                                                                                                                                                                                                                                                                                                                                                    |
| NTC                  | NTCs were included in each run. The absence of both amplification and melting curve peaks were mandatory for the acceptance of the run.                                                                                                                                                                                                                                                                                                                                                                                                                        |
| NAC                  | Minus RT controls were prepared from randomly selected RNA samples.                                                                                                                                                                                                                                                                                                                                                                                                                                                                                            |
| Positive control     | Inter-run calibrators were not used.                                                                                                                                                                                                                                                                                                                                                                                                                                                                                                                           |
| <b>Data analysis</b> |                                                                                                                                                                                                                                                                                                                                                                                                                                                                                                                                                                |

|                                      |                                                                                                                                                                                                                                                                                                                                                                                                                                                                                                                                                                                                   |
|--------------------------------------|---------------------------------------------------------------------------------------------------------------------------------------------------------------------------------------------------------------------------------------------------------------------------------------------------------------------------------------------------------------------------------------------------------------------------------------------------------------------------------------------------------------------------------------------------------------------------------------------------|
| Specialist software                  | Data were analyzed using the MxPro real-time QPCR software (Stratagene), considering both amplification efficiencies and normalization to GAPDH as reference gene.                                                                                                                                                                                                                                                                                                                                                                                                                                |
| Statistical justification            | Primary chondrocytes (PCs) were isolated from 3 donors and cultured and analyzed separately. SW1353 and THP-1 cells were seeded in duplicate. All qPCR reactions were performed in duplicate. Data were exported to the GraphPad Prism statistics software package (GraphPad Prism Software, USA). The Gaussian distribution of the data was verified using the Kolmogorov-Smirnov test. Statistics were performed using one-way analysis of variance (ANOVA) with post hoc Tukey tests, cross-comparing all study groups (95% confidence interval). p-values < 0.05 were considered significant. |
| Transparent, validated normalisation | The expression stability of 5 candidate reference genes (GAPDH, ACTB, HPRT1, SDHA, B2M) was determined across the samples using geNorm. GAPDH was selected as stable reference gene under the experimental conditions of this study.                                                                                                                                                                                                                                                                                                                                                              |
